# Supplementary material
Source: PubMed Central journal article supplement (PMC6550107)
Supplement: mmc1.pdf [file mmc1.pdf]

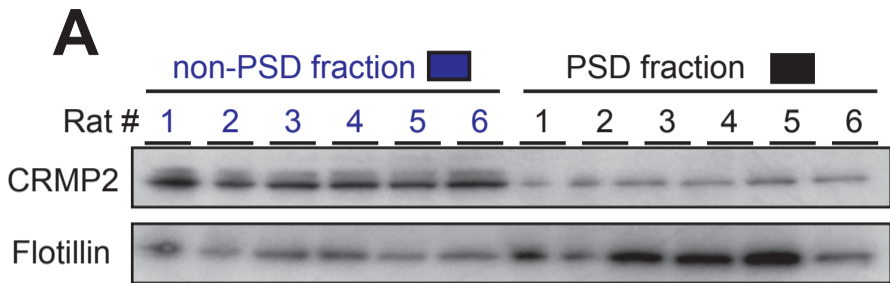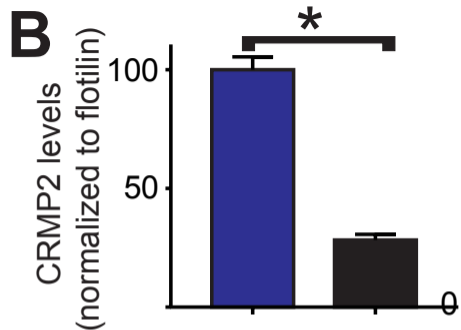

**Supplementary Figure 1. CRMP2 expression is concentrated at the presynaptic sites of the dorsal horn.** (A) Immunoblots showing the pre-synaptic and post-synaptic CRMP2 expression levels in the lumbar dorsal horn of the spinal cord of animals having received a spared nerve injury. Non-PSD fraction is pre-synaptic and PSD fraction is post-synaptic. Flotillin is used as a loading control. (B) Bar graph showing CRMP2 expression levels at the pre-synaptic sites compared to post-synaptic sites in the ipsilateral side of lumbar dorsal horn of the spinal cord. Mean  $\pm$  s.e.m., \* $p < 0.05$ , Mann-Whitney compared to the contralateral side. PSD: post-synaptic density.
